# Increased Risk Factors for Coronary Artery Disease in Japanese Subjects With Hyperinsulinemia or Glucose Intolerance

NOBUHIRO YAMADA, MD  
HIDEYO YOSHINAGA, MD  
NOBORU SAKURAI, MD  
HITOSHI SHIMANO, MD

TAKANARI GOTODA, MD  
YASUO OHASHI, PHD  
YOSHIO YAZAKI, MD  
KINORI KOSAKA, MD

**OBJECTIVE**— To understand the interrelationship of coronary artery disease (CAD) risk factors including hyperlipidemia, hypertension, and glucose intolerance to prevent and better manage this disease.

**RESEARCH DESIGN AND METHODS**— We performed a 100-g oral glucose tolerance test in 2,113 subjects, and we evaluated their plasma lipid levels, blood pressure (BP), and plasma glucose and plasma insulin responses.

**RESULTS**— Multiple regression analysis demonstrated a significant relationship of either BP, plasma triglyceride (TG), or high-density lipoprotein (HDL) cholesterol levels to plasma insulin and glucose response after the glucose load. Plasma cholesterol levels were related only to the plasma glucose response. In subjects matched for age, sex, and body mass index (BMI) with hyperinsulinemia or normoinsulinemia, the hyperinsulinemic subjects had a significantly higher mean BP and plasma TG level than the normoinsulinemic subjects (128.8/82.3 vs. 122.9/79.3 mmHg and 172.1 vs. 119.4 mg/dl), and the HDL-cholesterol level was significantly lower (43.9 vs. 47.8 mg/dl). Furthermore, subjects matched for age, sex, and BMI with glucose intolerance had a higher mean BP (128.4/81.8 vs. 123.5/78.7 mmHg) and higher plasma TG level (154.2 vs. 123.0 mg/dl) than those without glucose intolerance.

**CONCLUSIONS**— Based on these findings, subjects with hyperinsulinemia or glucose intolerance should be carefully managed to prevent CAD, because they have more numerous and more severe risk factors than subjects with normal plasma insulin levels or subjects without glucose intolerance.

From the 3rd Department of Internal Medicine (N.Y., H.S., T.G., Y.Y.), Department of Epidemiology (Y.O.), University of Tokyo; and Toranomon Hospital (H.Y., N.S., K.K.), Tokyo, Japan.

Address correspondence and reprint requests to Nobuhiro Yamada, MD, 3rd Department of Internal Medicine, University of Tokyo, Tokyo, Japan 113.

Received for publication 30 November 1992 and accepted in revised form 19 August 1993.

CAD, coronary artery disease; HDL, high-density lipoprotein; LDL, low-density lipoprotein; BMI, body mass index; BP, blood pressure; sBP, systolic blood pressure; dBP, diastolic blood pressure; TG, triglyceride; OGTT, oral glucose tolerance test.

Patients with coronary artery disease (CAD) often have multiple risk factors including plasma lipid abnormalities, hypertension, and abnormal glucose tolerance (1–4). Recently, it has been suggested that hyperinsulinemia is related to hypertension, hypertriglyceridemia, and a low plasma high-density lipoprotein (HDL) cholesterol level, and that these risk factors may be caused by impaired insulin action (5–9). However, the relationship of glucose intolerance with coronary risk factors has not been fully understood. In the analysis of the relationship among coronary risk factors, it is important to minimize the factor of obesity, because both insulin sensitivity and glucose intolerance are significantly affected by body weight. The Japanese population has a relatively low body mass index (BMI) (22–23 kg/m<sup>2</sup>) compared with the Caucasian population (5,8). Therefore, we analyzed a large population (*n* = 2,113) in Tokyo to clarify the relationship of coronary risk factors with the evaluation of glucose tolerance and insulin response after an oral glucose load. The findings provide evidence that subjects with hyperinsulinemia or glucose intolerance have higher plasma triglyceride (TG) levels, lower plasma HDL-cholesterol levels, and higher systolic blood pressure (sBP) and diastolic blood pressure (dBP) compared with subjects with normal plasma insulin levels or without glucose intolerance.

## RESEARCH DESIGN AND METHODS

We studied 2,113 subjects including 1,375 men and 738 women. These 2,113 subjects were selected from 2,631 subjects who visited Toranomon Hospital (Tokyo, Japan) for their general health examination, because they had not received any medication for diabetes, hypertension, or hyperlipidemia, had no abnormal liver or kidney functions, and had not received any operation. Toranomon Hospital is located in the center of Tokyo where we have government offices and large com-

**Table 1—Characteristics of study subjects and prevalences of hypertension, hyperinsulinemia, hypertriglyceridemia, low HDL cholesterolemia, and hypercholesterolemia**

|                                |                  |
|--------------------------------|------------------|
| Characteristics                |                  |
| n                              | 2,113            |
| Sex (M/F)                      | 1,375/738        |
| Age (years)                    | 53.7 ± 10.4      |
| BMI (kg/m <sup>2</sup> )       | 22.9 ± 2.9       |
| BP (mmHg)                      | 122 ± 18/77 ± 12 |
| Plasma TG (mg/dl)              | 122 ± 84         |
| Plasma cholesterol (mg/dl)     | 203 ± 37         |
| Plasma LDL cholesterol (mg/dl) | 129 ± 34         |
| Plasma HDL cholesterol (mg/dl) | 51 ± 14          |
| Prevalences (%)                |                  |
| Obesity                        | 20.9             |
| Hypertension                   | 23.1             |
| Hyperinsulinemia               | 11.0             |
| Hypertriglyceridemia           | 24.4             |
| Hypercholesterolemia           | 15.7             |
| High LDL cholesterol           | 17.9             |
| Low HDL cholesterol            | 23.0             |

Data are means ± SD.

panies; therefore, the majority of study subjects were office workers and the minority were people who live in this area. As part of their general health examination, all subjects stayed at the hospital for 2 days, and venous blood samples were drawn after a 15-h fast for analysis of the concentration of plasma TG, cholesterol, HDL cholesterol, and an oral glucose tolerance test (OGTT). Before and 30, 60, 90, 120, and 180 min after a 100-g load of oral glucose, the plasma glucose (10) and insulin (11) concentrations were determined. To evaluate plasma insulin response, a 100-g glucose rather than a 75-g glucose was loaded. Plasma TG (12), cholesterol (13), and HDL-cholesterol (14) levels were measured by enzymatic method, and the plasma insulin level was measured by radioimmunoassay.

Based on the determination of plasma insulin concentration, hyperinsulinemia ( $n = 233$ ) was defined as both fasting and 2-h plasma insulin levels above the 80th percentile of respective plasma insulin distribution in study subjects after an oral glucose load (fasting level  $\geq 11 \mu\text{U/ml}$  and post 2-h level  $\geq 79 \mu\text{U/ml}$ ), and normoinsulinemia ( $n = 1,442$ ) was defined as both fasting and

2-h plasma insulin levels below the 80th percentile after an oral glucose load. Blood pressure (BP) was measured with a sphygmomanometer, with the subjects recumbent for at least 10 min. sBP  $\geq 140$  or dBP  $\geq 90$  mmHg was defined as hy-

pertension ( $n = 489$ ), sBP  $< 130$  mmHg and dBP  $< 85$  mmHg was defined as normal ( $n = 1,311$ ), according to the fifth report of the National High Blood Pressure Education Program (15). Subjects with glucose intolerance ( $n = 408$ ) were defined as 2-h plasma glucose levels above the 80th percentile of plasma glucose distribution in study subjects after an oral glucose load (post 2-h level  $\geq 133$  mg/dl), and other subjects were defined as nonglucose intolerant. BMI  $\leq 21.5$  and  $\geq 25$  kg/m<sup>2</sup> were defined as lean ( $n = 689$ ) and obese ( $n = 441$ ), respectively. A matched control group for the subjects with hyperinsulinemia was created by matching a subject with normoinsulinemia of similar age, sex, and BMI for each subject with hyperinsulinemia. Similarly, a matched control group consisting of age, sex, and BMI was created for the subjects with glucose intolerance.

Results were expressed as means ± SD unless otherwise stated. The unpaired Student's *t* test was used to compare mean group values. The multiple regression analysis was performed

**Table 2—Age, BMI, plasma lipid levels, and BP in subjects matched for age, sex, and BMI subclassified by plasma insulin levels**

|                                | Normoinsulin  | Hyperinsulin   |
|--------------------------------|---------------|----------------|
| n                              | 216           | 216            |
| Sex (F/M)                      | 61/155        | 61/155         |
| Age (years)                    | 54.4 ± 9.9    | 54.4 ± 9.9     |
| BMI (kg/m <sup>2</sup> )       | 25.0 ± 2.6    | 25.0 ± 2.6     |
| Lipids (mg/dl)                 |               |                |
| TGs                            | 119.4 ± 72.1  | 172.1 ± 116.9* |
| Cholesterol                    | 204.4 ± 36.9  | 211.0 ± 39.6   |
| LDL cholesterol                | 133.1 ± 34.4  | 135.4 ± 35.8   |
| HDL cholesterol                | 47.8 ± 12.7   | 43.9 ± 11.3*   |
| BP (mmHg)                      |               |                |
| sBP                            | 122.9 ± 18.1  | 128.8 ± 20.8†  |
| dBP                            | 79.3 ± 11.7   | 82.3 ± 13.7†   |
| Σ-plasma glucose (mg/dl)       | 711.8 ± 262.4 | 778.6 ± 212.4† |
| Σ-insulin ( $\mu\text{U/ml}$ ) | 201.3 ± 85.1  | 559.6 ± 200.0* |

Data are means ± SD.

\* $P < 0.001$ .† $P < 0.005$ .\* $P < 0.05$ .

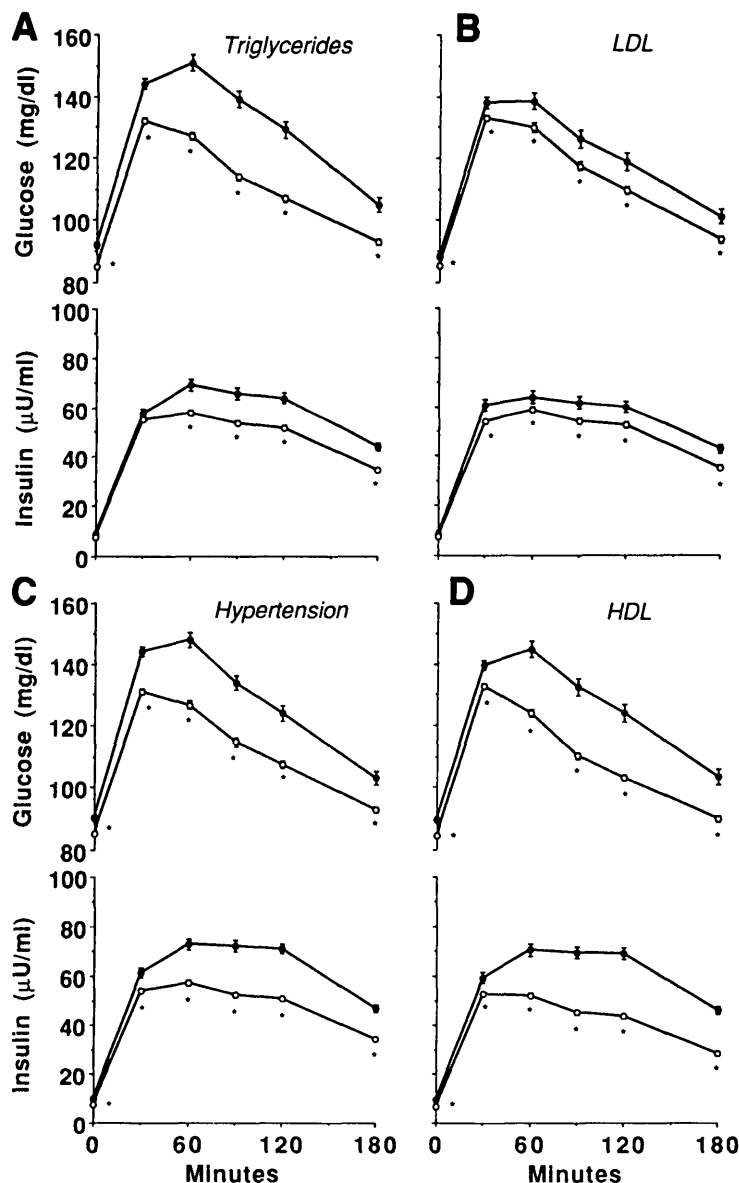

**Figure 1**—Plasma glucose and insulin responses after a 100-g oral glucose load. In a panel of hypertension, hypertensive subjects (●—●,  $n = 489$ ) were compared with normotensive subjects (○—○,  $n = 1,311$ ). Similarly, subjects with hypertriglyceridemia (●—●,  $n = 516$ ), low plasma HDL-cholesterol levels (●—●,  $n = 484$ ), and high plasma LDL-cholesterol levels (●—●,  $n = 378$ ) were compared with subjects with plasma TG levels  $<150$  mg/dl (○—○,  $n = 1,597$ ), plasma HDL-cholesterol levels  $\geq 40$  mg/dl (○—○,  $n = 1,629$ ), and plasma LDL-cholesterol levels  $<130$  mg/dl (○—○,  $n = 1,123$ ), respectively. Values are means  $\pm$  SE. \* $P < 0.05$ .

with Statview II (version 1.02). Low-density lipoprotein (LDL) cholesterol was calculated as follows: LDL cholesterol = (cholesterol) - (HDL cholesterol) -  $(0.2 \times \text{TG})$ .

**RESULTS**—Means  $\pm$  SD in all subjects were as follows:  $53.7 \pm 10.4$  years of age, a BMI of  $22.9 \pm 2.9$  kg/m<sup>2</sup>, plasma TG of  $122 \pm 84$ , cholesterol of  $203 \pm 37$  mg/dl, LDL cholesterol of

$129 \pm 34$  mg/dl, HDL cholesterol of  $51 \pm 14$  mg/dl, and BP of  $122 \pm 18/77 \pm 12$  mmHg. The prevalences of hypertension, hyperinsulinemia, glucose intolerance, hypertriglyceridemia ( $\geq 150$  mg/dl), hypercholesterolemia ( $\geq 240$  mg/dl), high LDL cholesterol ( $\geq 160$  mg/dl), and low HDL cholesterol ( $<40$  mg/dl) in all subjects were 23.1, 11.0, 19.3, 24.4, 15.7, 17.9, and 23.0%, respectively (Table 1).

#### OGTT pattern in subjects with coronary risk factors

In hypertensive subjects, plasma insulin and glucose responses after an oral glucose load were much higher than in the normotensive subjects as shown in Fig. 1. Similar results were observed in hypertriglyceridemia and in low HDL cholesterol as shown in Fig. 1. A less significant difference was detected in the OGTT pattern between subjects with a plasma LDL-cholesterol level of  $\geq 160$  mg/dl and subjects with a plasma LDL-cholesterol level of  $<130$  mg/dl. Hyperinsulinemic subjects were shown to be glucose intolerant compared with normoinsulinemic subjects (Fig. 2).

#### Coronary risk factors in subjects with hyperinsulinemia or glucose intolerance

Groups matched for age, BMI, and sex were selected from the total study subjects to analyze the relationship between hyperinsulinemia and coronary risk factors without effects of age, sex, and obesity. Hyperinsulinemic subjects in the matched group had significantly high plasma TG levels, low HDL-cholesterol levels, and high sBP and dBP levels compared with matched normoinsulinemic subjects (Table 2). No significant difference in the plasma cholesterol and LDL-cholesterol levels were found between the two groups (Table 2).

The relationship between glucose tolerance and coronary risk factors also was evaluated in age-, BMI-, and sex-matched subjects selected from all study subjects. The glucose intolerant subjects

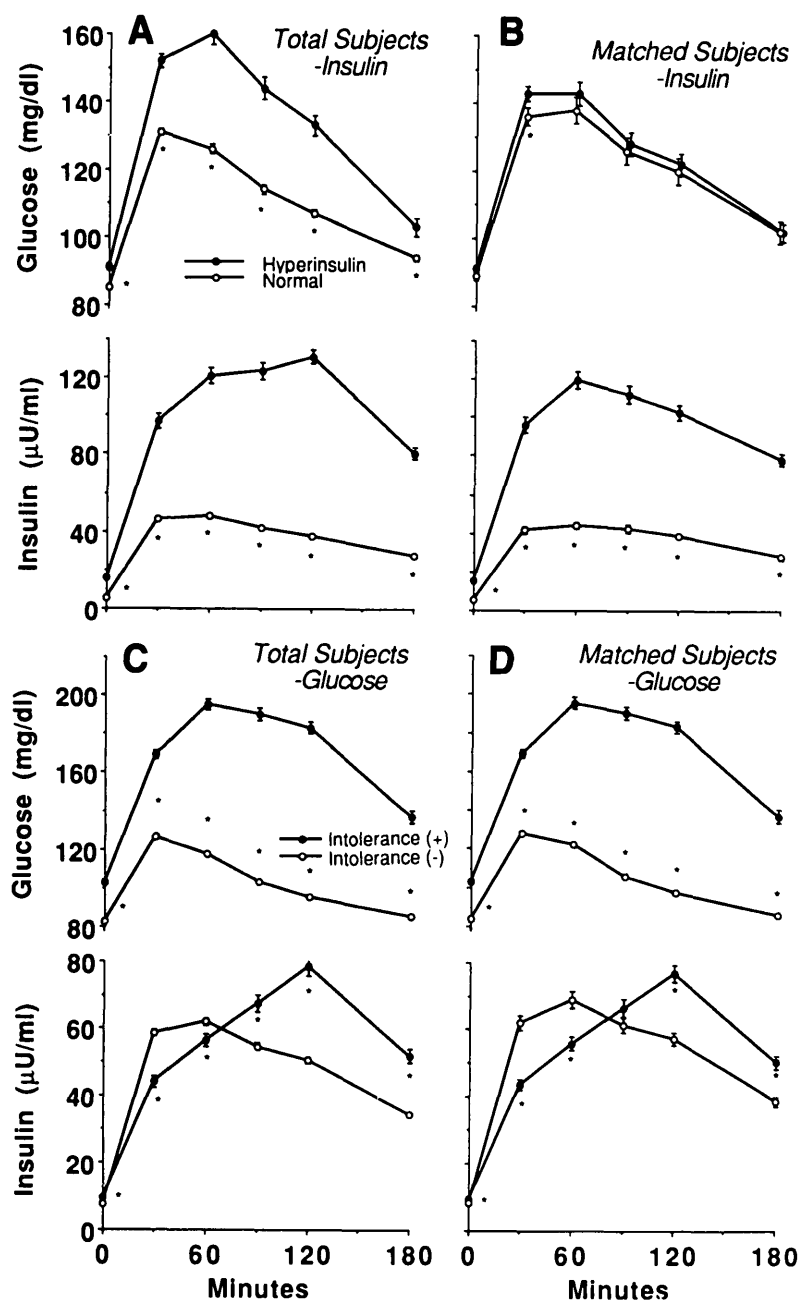

**Figure 2**—Plasma glucose and insulin responses after a 100-g oral glucose load. A: Subjects with hyperinsulinemia ( $n = 233$ ) and normoinsulinemia ( $n = 1,426$ ) in all study subjects. B: Subjects with hyperinsulinemia ( $n = 216$ ) and normoinsulinemia ( $n = 216$ ) in groups matched for age, sex, and BMI. C: Glucose intolerant subjects ( $n = 408$ ) and nonglucose intolerant subjects ( $n = 1,705$ ) in all study subjects; D: Glucose intolerant subjects ( $n = 386$ ) and nonglucose intolerant subjects ( $n = 386$ ) in groups matched for age, sex, and BMI. Glucose intolerance was defined in terms of quintiles of 2-h blood glucose levels after the oral glucose load. Values are means  $\pm$  SE. \* $P < 0.05$ .

had significantly higher plasma TG levels and higher sBP and dBP levels compared with matched nonglucose intolerant subjects (Table 3). No significant difference was observed in the plasma cholesterol, LDL- and HDL-cholesterol levels between the two groups.

The relationship of the mean value of each risk factor to the  $\Sigma$ -insulin level or the severity of glucose intolerance was analyzed in all subjects. The magnitude of each risk factor became more severe according to the level of  $\Sigma$ -insulin as shown in Fig. 3. According to the severity of the glucose intolerance, all of the risk factors appeared to worsen in all subjects (Fig. 4).

#### Multiple regression analysis

sBP and dBP, plasma TG, cholesterol, LDL- and HDL-cholesterol levels were assigned to dependent values, and the sum of each plasma insulin level and plasma glucose level during OGTT ( $\Sigma$ -insulin and  $\Sigma$ -glucose, respectively), BMI, age, and sex were assigned to independent values (Table 4). BP, plasma TG, and HDL-cholesterol levels were significantly related to these independent variables, whereas the plasma cholesterol and LDL-cholesterol levels were not significantly related to  $\Sigma$ -insulin. BP was most significantly related to age and least related to  $\Sigma$ -insulin among variables, whereas the plasma TG and HDL-cholesterol levels were highly related to both  $\Sigma$ -insulin and  $\Sigma$ -glucose. Sex was significantly related to each risk factor for CAD as shown in Table 4. Plasma TG and BP levels were higher and plasma cholesterol, LDL-cholesterol levels, and HDL-cholesterol levels were lower in men than in women. As shown in Table 5,  $r^2$  values of multiple regression analysis were better when both  $\Sigma$ -glucose and  $\Sigma$ -insulin were included than with  $\Sigma$ -glucose or  $\Sigma$ -insulin alone.

These relations were similar in subjects with BMI  $< 25$  kg/m<sup>2</sup>, in subjects without glucose intolerance, and in subjects matched for age, sex, and BMI. Furthermore, we calculated the residual

**Table 3—Age, BMI, plasma lipid levels, and BP in subjects matched for age, sex, and BMI subclassed by glucose tolerance**

|                          | Nonglucose intolerant | Glucose intolerant |
|--------------------------|-----------------------|--------------------|
| n                        | 386                   | 386                |
| Sex (F/M)                | 101/285               | 101/285            |
| Age (years)              | 56.5 ± 9.4            | 56.5 ± 9.4         |
| BMI (kg/m <sup>2</sup> ) | 23.9 ± 2.9            | 23.9 ± 2.9         |
| Lipids (mg/dl)           |                       |                    |
| TGs                      | 123.0 ± 83.7          | 154.2 ± 103.3*     |
| Cholesterol              | 205.2 ± 39.1          | 208.9 ± 39.0       |
| LDL cholesterol          | 132.0 ± 35.8          | 131.7 ± 36.3       |
| HDL cholesterol          | 49.6 ± 13.3           | 47.8 ± 14.1        |
| BP (mmHg)                |                       |                    |
| sBP                      | 123.5 ± 16.9          | 128.4 ± 19.1*      |
| dBP                      | 78.7 ± 11.6           | 81.8 ± 13.0*       |
| Σ-plasma glucose (mg/dl) | 624.1 ± 92.0          | 977.6 ± 301.6*     |
| Σ-insulin (μU/ml)        | 296.9 ± 159.8         | 301.7 ± 193.1      |

Data are means ± SD.

\*P &lt; 0.001.

of Σ-insulin, Σ-glucose, BPs, plasma cholesterol, TG, HDL-cholesterol levels, and LDL-cholesterol levels by the regression of these seven factors on age, sex, and BMI to alleviate the influential factors of age, sex, and BMI. Results similar to those obtained from the multiple regression analysis were demonstrated. To know the effects of sex on the relationship between coronary risk factors and either plasma insulin or glucose response, Σ-insulin-sex and Σ-glucose-sex interactions were analyzed. We found a significant relationship only between HDL cholesterol and Σ-insulin-sex. Therefore, no significant variations by sex were observed in the relationship between coronary risk factors and either plasma insulin or glucose level, except between HDL cholesterol and Σ-insulin.

**CONCLUSIONS**— Data from the 100-g OGTTs of 2,113 subjects were analyzed to examine the relationship between coronary risk factors and plasma insulin response or glucose tolerance. As characteristic of the Tokyo population, these subjects have a relatively low BMI

compared with the Caucasian population. The average BMI in our population was much less than that in Caucasian subjects, such as that reported by Zavaroni et al. (8) (22.9 vs. 24.7 kg/m<sup>2</sup>), which indicates that the effects of obesity on coronary risk factors were much less in the Japanese population. Obese subjects (BMI ≥25 and ≥27 kg/m<sup>2</sup>) in this study were 20.9 and 8.1% of total subjects, respectively.

We found that subjects with hypertriglyceridemia, a low HDL-cholesterol level, and hypertension have a relatively high insulin response and glucose intolerance after glucose load, whereas hyperinsulinemia was less significant in subjects with a high LDL-cholesterol level. These results indicate that risk factors other than plasma LDL cholesterol are significantly related to insulin resistance. To exclude the possible influence of obesity even in a population with relatively low BMI, we selected matched

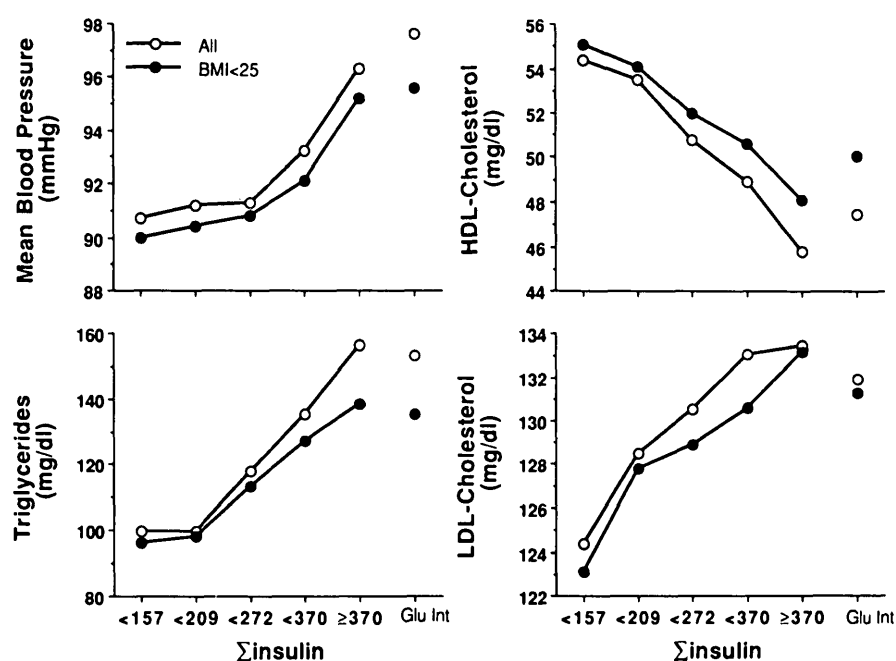

**Figure 3**—Relationship of plasma insulin levels with mean BP (1/3 of sBP and 2/3 of dBP), plasma TG, HDL-cholesterol level, and LDL-cholesterol level in all subjects and in subjects with BMI <25 kg/m<sup>2</sup>. Subjects were divided into five subgroups according to the level of Σ-insulin. Each value is the mean.

Table 4—Multiple regression analysis for insulin levels, BP, plasma lipids, and other relevant variables in total subjects

| Variables       | t values | P values | Coefficient | SE    |
|-----------------|----------|----------|-------------|-------|
| sBP             |          |          |             |       |
| Σ-insulin       | 2.92     | 0.004    | 0.007       | 0.002 |
| Σ-glucose       | 4.98     | 0.001    | 0.009       | 0.002 |
| BMI             | 6.81     | 0.001    | 0.895       | 0.131 |
| Age             | 14.60    | 0.001    | 0.507       | 0.035 |
| Sex             | 4.50     | 0.001    | 3.394       | 0.754 |
| dBP             |          |          |             |       |
| Σ-insulin       | 2.45     | 0.014    | 0.004       | 0.002 |
| Σ-glucose       | 3.97     | 0.001    | 0.005       | 0.001 |
| BMI             | 7.35     | 0.001    | 0.684       | 0.093 |
| Age             | 7.28     | 0.001    | 0.179       | 0.025 |
| Sex             | 5.40     | 0.001    | 2.880       | 0.533 |
| TGs             |          |          |             |       |
| Σ-insulin       | 8.15     | 0.001    | 0.091       | 0.011 |
| Σ-glucose       | 8.73     | 0.001    | 0.070       | 0.008 |
| BMI             | 8.46     | 0.001    | 5.201       | 0.615 |
| Age             | 4.58     | 0.001    | -0.743      | 0.162 |
| Sex             | 10.62    | 0.001    | 37.429      | 3.524 |
| HDL cholesterol |          |          |             |       |
| Σ-insulin       | 4.70     | 0.001    | -0.009      | 0.002 |
| Σ-glucose       | 3.29     | 0.001    | -0.004      | 0.001 |
| BMI             | 13.88    | 0.001    | -1.426      | 0.103 |
| Age             | 3.91     | 0.001    | 0.106       | 0.027 |
| Sex             | 13.19    | 0.001    | -7.751      | 0.588 |
| LDL cholesterol |          |          |             |       |
| Σ-insulin       | 0.78     | 0.438    | 0.004       | 0.005 |
| Σ-glucose       | 0.84     | 0.399    | 0.003       | 0.003 |
| BMI             | 7.86     | 0.001    | 2.071       | 0.264 |
| Age             | 8.58     | 0.001    | 0.597       | 0.070 |
| Sex             | 8.45     | 0.001    | -12.752     | 1.509 |
| Cholesterol     |          |          |             |       |
| Σ-insulin       | 1.56     | 0.119    | 0.008       | 0.005 |
| Σ-glucose       | 2.86     | 0.004    | 0.011       | 0.004 |
| BMI             | 5.85     | 0.001    | 1.676       | 0.287 |
| Age             | 7.92     | 0.001    | 0.600       | 0.076 |
| Sex             | 8.18     | 0.001    | -13.453     | 1.644 |

Σ-insulin, Σ-glucose, BMI, age, and sex are independent variables. sBP, dBP, TGs, HDL cholesterol, LDL cholesterol, and cholesterol are dependent variables.

subjects with hyperinsulinemia or normoinsulinemia. Both groups in the matched subjects had a similar plasma glucose response after glucose loading compared with the total number of study subjects (Fig. 2), which suggests that the effects of glucose intolerance on coronary risks are not significantly different between the matched subjects with hyper-

insulinemia and normoinsulinemia. Because significant differences were found in the plasma TG and HDL-cholesterol levels and BP between the matched groups, the pathophysiology of these factors are thought to be related to the hyperinsulinemic state or to insulin resistance, independent of BMI, age, sex, and glucose intolerance factors. We also

Table 5— $r^2$  values in each multiple regression analysis

| Variables               | $r^2$ values |
|-------------------------|--------------|
| sBP                     |              |
| Σ-insulin and Σ-glucose | 0.165        |
| Σ-insulin               | 0.155        |
| Σ-glucose               | 0.161        |
| dBP                     |              |
| Σ-insulin and Σ-glucose | 0.100        |
| Σ-insulin               | 0.094        |
| Σ-glucose               | 0.097        |
| TGs                     |              |
| Σ-insulin and Σ-glucose | 0.204        |
| Σ-insulin               | 0.175        |
| Σ-glucose               | 0.179        |
| HDL cholesterol         |              |
| Σ-insulin and Σ-glucose | 0.231        |
| Σ-insulin               | 0.227        |
| Σ-glucose               | 0.223        |
| LDL cholesterol         |              |
| Σ-insulin and Σ-glucose | 0.091        |
| Σ-insulin               | 0.091        |
| Σ-glucose               | 0.090        |
| Cholesterol             |              |
| Σ-insulin and Σ-glucose | 0.083        |
| Σ-insulin               | 0.079        |
| Σ-glucose               | 0.083        |

Σ-insulin and Σ-glucose are independent variables. sBP, dBP, TGs, HDL cholesterol, LDL cholesterol, and cholesterol are dependent variables.

demonstrated that glucose intolerance was an important determinant for plasma TG level and BP, from the analysis of subjects matched for age, sex, and BMI.

Furthermore, we performed multiple regression analysis to clarify the relationship of risk factors and hyperinsulinemia, glucose intolerance, age, BMI, or sex. Plasma TG and HDL-cholesterol levels and BP were related to hyperinsulinemia, glucose intolerance, age, BMI, or sex. Plasma cholesterol and LDL-cholesterol levels were not related to hyperinsulinemia. Age was the most important factor in the determination of BP, followed by BMI, and plasma insulin response was the least important. On the other hand, Zavaroni et al. (8) reported that the plasma insulin response was a more important determinant for BP than

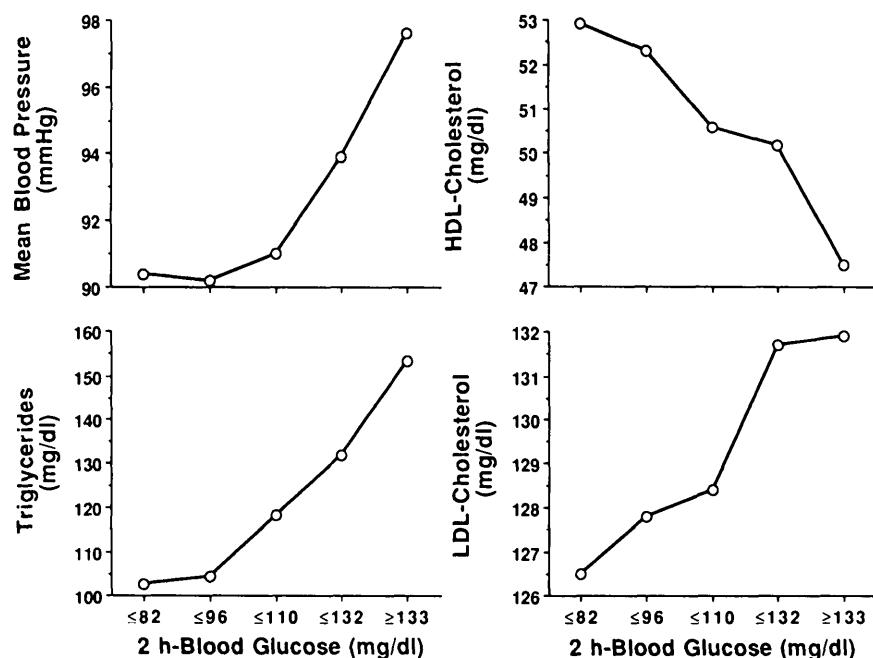

**Figure 4**—Mean BP, plasma TG, HDL-cholesterol level, and LDL-cholesterol level in each quintile of the 2-h plasma glucose level after an oral glucose load. The sum of 1/3 of sBP and 2/3 of dBP (mmHg) was expressed as mean BP. Each value is the mean.

either plasma glucose response after an oral glucose load or BMI in healthy subjects with normal glucose tolerance. Our analysis indicates that the plasma insulin level was a more significant determinant for plasma TG or HDL-cholesterol level than for BP, whereas factors other than the plasma insulin level were important determinants for plasma cholesterol and LDL-cholesterol levels. In relation to plasma insulin level, plasma TG, HDL cholesterol, and BP are considered to be a group of risk factors, and plasma cholesterol and LDL cholesterol are risk factors different from the others.

Many studies have reported a significant relationship between BP and hyperinsulinemia or insulin resistance (2,5–9,16) and a relationship between plasma lipid abnormalities and insulin resistance (7–9,17,18). Our results supported these previous studies by analyzing a large population with low BMI using the OGTT and clarified the relationship among risk factors. We di-

vided the subjects into five subgroups by plasma insulin levels. The magnitude of each risk factor worsened according to the plasma insulin level, and subjects with glucose intolerance, whose mean  $\Sigma$ -insulin value (240  $\mu$ U/ml) was much lower than that in hyperinsulinemic subjects, had relatively severe risk factors as shown in Fig. 3. This result suggests that the metabolic state caused by glucose intolerance and hyperinsulinemia is clearly involved in the pathophysiology of each risk factor for coronary atherosclerosis as reported previously (19–27), particularly in the pathophysiology of high plasma TG level and high BP, as demonstrated in the analysis of subjects matched for age, sex, and BMI (Table 3). In fact, the magnitude of each coronary risk factor became more severe in accordance with the severity of glucose intolerance (Fig. 4) and that of the  $\Sigma$ -insulin level (Fig. 3).

Multiple risk factors including hyperlipidemia and hypertension are

commonly observed in patients with CAD. In this study, we established the close relationship of risk factors for CAD to either glucose intolerance, hyperinsulinism, or both through the analysis of OGTT in a large population. In conclusion, both the plasma insulin level and glucose intolerance were determinants for the severity of coronary risk factors. Careful management of both glucose intolerance and hyperinsulinism may reduce the risks for CAD and further prevent the disease.

**Acknowledgments**—This study was supported by a grant for diabetes research from Otsuka Pharmaceutical Company.

We would like to thank Drs. K. Kozaki, K. Harada, M. Kawamura, Y. Watanabe, M. Shimada, K. Yamamoto, and Y. Tsubamoto for assistance with data input.

## References

1. Zavaroni I, Dall'Aglio E, Bonora E, Alpi O, Passeri M, Reaven GM: Evidence that multiple risk factors for coronary artery disease exist in individuals with abnormal glucose tolerance. *Am J Med* 83: 609–12, 1987
2. Kannel WB, Gordon T, Schwartz MJ: Systolic versus diastolic blood pressure and risk of coronary artery disease: the Framingham Study. *Am J Cardiol* 27: 335–46, 1971
3. Fuller JH, Shipley MJ, Rose G, Jarrett RJ, Keen H: Coronary heart disease risk and impaired glucose tolerance: the Whitehall Study. *Lancet* 1:1373–76, 1980
4. Consensus Conference: Lowering blood cholesterol to prevent heart disease. *JAMA* 253:2080–86, 1985
5. Ferrannini E, Buzzigoli G, Bonadonna R, Giorico MA, Oleggini M, Graziadei L, Pedrinelli R, Brandi L, Bevilacqua S: Insulin resistance in essential hypertension. *N Engl J Med* 317:350–57, 1987
6. Singer P, Godicke W, Voigt S, Hajdu I, Weiss M: Postprandial hyperinsulinemia in patients with mild essential hypertension. *Hypertension* 7:182–86, 1985
7. Reaven GM: Banting Lecture 1988: Role of insulin resistance in human disease.

- Diabetes* 37:1595–607, 1988
8. Zavaroni I, Bonora E, Pagliara M, Dall'Aglio E, Luchetti L, Buonanno G, Bonati PA, Bergonzani M, Gnudi L, Passeri M, Reaven G: Risk factors for coronary artery disease in healthy persons with hyperinsulinemia and normal glucose tolerance. *N Engl J Med* 320:702–706, 1989
9. Williams RR, Hunt SC, Hopkins PN, Stults BM, Wu LL, Hasstedt SJ, Barlow GK, Stephenson SH, Lalouel JM, Kuida H: Familial dyslipidemic hypertension: evidence from 58 Utah families for a syndrome present in approximately 12% of patients with essential hypertension. *JAMA* 259:3579–86, 1988
10. Kadish AH, Litle RL, Sternberg JC: A new and rapid method for determination of glucose by measurement of rate of oxygen consumption. *Clin Chem* 14: 116–31, 1968
11. Hales CN, Randle PJ: Immunoassay of insulin with insulin antibody precipitate. *Biochem J* 88:137–46, 1963
12. Wahlfeld AW: Triglyceride determination after enzymatic hydrolysis. In *Methods of Enzymatic Analysis*. Bergmeyer HU, Ed. New York, Academic, 1974, p. 1831–35
13. Allain CC, Poon LS, Chan CS, Richmond W, Fu PC: Enzymatic determination of total serum cholesterol. *Clin Chem* 20: 470–75, 1974
14. Lopes-Virella HF, Stone P, Ellis S, Colwell JA: Cholesterol determination in high-density lipoprotein separated by three different methods. *Clin Chem* 23: 882–84, 1977
15. National high blood pressure education program: the fifth report of the joint national committee on detection, evaluation, and treatment of high blood pressure (JNC V). *Arch Intern Med* 153:154–83, 1993
16. Modan M, Halkin H, Almog S, Lusky A, Eshkol A, Shefi M, Shitrit A, Fuchs Z: Hyperinsulinemia: a link between hypertension, obesity, and glucose intolerance. *J Clin Invest* 75:809–17, 1985
17. Tobey TA, Greenfield M, Kraemer F, Reaven GM: Relationship between insulin resistance, insulin secretion, very-low-density lipoprotein kinetics, and plasma triglyceride levels in normotriglyceridemic man. *Metabolism* 30:165–71, 1981
18. Frayn KN, Coppack SW: Insulin resistance, adipose tissue, and coronary heart disease. *Clin Sci* 82:1–8, 1992
19. DeFronzo RA, Ferrannini E: Insulin resistance: a multifaceted syndrome responsible for NIDDM, obesity, hypertension, dyslipidemia, and atherosclerotic cardiovascular disease. *Diabetes Care* 14: 173–94, 1991
20. Stolar MW: Atherosclerosis in diabetes: the role of hyperinsulinemia. *Metabolism* 37 (Suppl. 1):1–9, 1988
21. Howard BV: Lipoprotein metabolism in diabetes mellitus. *J Lipid Res* 28:613–28, 1987
22. Pell S, D'Alonzo CA: Some aspects of hypertension in diabetes mellitus. *JAMA* 202:104–10, 1967
23. Stamler J, Rhomberg P, Schoenberger JA, Shekelle RB, Dyer A, Shekelle S, Stamler R, Wannamaker J: Multivariate analysis of the relationship of seven variables to blood pressure: findings of the Chicago Heart Association detection project in industry, 1967–1972. *J Chronic Dis* 28: 527–48, 1975
24. Fournier AM, Gadia MT, Kubrusly DB, Skyler JS, Sosenko JM: Blood pressure, insulin, and glycemia in nondiabetic subjects. *Am J Med* 80:861–64, 1986
25. Cambien F, Warnet J, Eschwege E, Jacqueson A, Richard JL, Rosselin G: Body mass, blood pressure, glucose, and lipids: does plasma insulin explain their relationships? *Arteriosclerosis* 7:197–202, 1987
26. Jarrett RJ, Keen H, McCartney M, Fuller JH, Hamilton PJS, Reid DD, Rose G: Glucose tolerance and blood pressure in two population samples: their relation to diabetes mellitus and hypertension. *Int J Epidemiol* 7:15–24, 1978
27. Lee T, Saltsman KA, Ohashi H, King G: Activation of protein kinase C by elevation of glucose concentration: proposal for a mechanism in the development of diabetic vascular complications. *Proc Natl Acad Sci USA* 86:5141–45, 1989
